# Supplementary material
Source: Royal Society of Chemistry journal article supplement (doi:10.1039/d6ob00780e)
Supplement: d6ob00780e1.pdf [file d6ob00780e1.pdf]

# Recent Advances in Chemoselective Protein Desulfurization: From VA-044 to Emerging Boron, Photochemical, Iron-Catalyzed, and Ultrasound Methods

Xiaoyang Ding<sup>b</sup>, Chuntong Li<sup>c</sup>, Xinyan Wang<sup>b</sup>, Lu-Jun Liang<sup>a,d,e\*</sup>

<sup>a</sup> Department of Biochemistry and Molecular Biology, School of Basic Medical Science, Zhengzhou University, Zhengzhou 450001, China;

<sup>b</sup> Tsinghua-Peking Joint Center for Life Sciences, MOE Key Laboratory of Bioorganic Phosphorus Chemistry and Chemical Biology, Department of Chemistry, Tsinghua University, Beijing 100084, China;

<sup>c</sup> School of Pharmaceutical Sciences, Henan Key Laboratory of Nanomedicine for Targeting Diagnosis and Treatment, China Pingyuan Laboratory, State Key Laboratory of Antiviral Drugs, Zhengzhou University, Zhengzhou, Henan, China;

<sup>d</sup> Center for BioAnalytical Chemistry, Hefei National Laboratory of Physical Science at Microscale, University of Science and Technology of China, Hefei 230026, China;

<sup>e</sup> Beijing Life Science Academy, Beijing 102209, China

\*Corresponding author. *E-mail:* [lujun@ustc.edu.cn](mailto:lujun@ustc.edu.cn)

|                       | Substrates                                                                                                                                         | Histones                                                                                                                                                                                                                                                                                                                                                                                                                                                                 | $\alpha$ -Synuclein                                                                                                           | Tau                                                                                                                                                                                          | Max                                                                                    | Other substrates                                                                                                                                                                                                                                                                                                                                        |
|-----------------------|----------------------------------------------------------------------------------------------------------------------------------------------------|--------------------------------------------------------------------------------------------------------------------------------------------------------------------------------------------------------------------------------------------------------------------------------------------------------------------------------------------------------------------------------------------------------------------------------------------------------------------------|-------------------------------------------------------------------------------------------------------------------------------|----------------------------------------------------------------------------------------------------------------------------------------------------------------------------------------------|----------------------------------------------------------------------------------------|---------------------------------------------------------------------------------------------------------------------------------------------------------------------------------------------------------------------------------------------------------------------------------------------------------------------------------------------------------|
| PTMs                  | Ubiquitination                                                                                                                                     | H2BK34Ub <sup>[1, 2]</sup> ;<br>H2BK120Ub <sup>[3, 4]</sup> ;<br>H3K14Ub <sup>[5]</sup> ;<br>H3K122Ub <sup>[6]</sup> ;                                                                                                                                                                                                                                                                                                                                                   | K6Ub <sup>[7]</sup> ;<br>K12Ub <sup>[8]</sup> ;<br>K12Ub <sub>2</sub> <sup>[8]</sup> ;<br>K12Ub <sub>4</sub> <sup>[8]</sup> ; |                                                                                                                                                                                              |                                                                                        | M <sub>1</sub> /K <sub>6</sub> /K <sub>11</sub> /K <sub>27</sub> /K <sub>29</sub> /K <sub>33</sub> /K <sub>48</sub> /K <sub>63</sub> -Ub <sub>2</sub> <sup>[9]</sup> ;<br>K <sub>11,48</sub> -<br>Ub <sub>3</sub> /Ub <sub>4</sub> /Ub <sub>5</sub> /Ub <sub>6</sub> <sup>[10]</sup><br>;<br>K <sub>48</sub> -Ub <sub>4</sub> -globin <sup>[11]</sup> ; |
|                       | Acetylation                                                                                                                                        | H2AK119Ac <sup>[12]</sup> ;<br>H3K56Ac <sup>[6]</sup>                                                                                                                                                                                                                                                                                                                                                                                                                    | M1Ac <sup>[13]</sup>                                                                                                          | K280Ac <sup>[14]</sup> ;<br>K311Ac <sup>[15]</sup> ;<br>K317Ac <sup>[15]</sup> ;<br>K353Ac <sup>[15]</sup> ;<br>K369Ac <sup>[15]</sup> ;                                                     | K31Ac <sup>[16]</sup> ;<br>K57Ac <sup>[16]</sup> ;<br>K31AcK57Ac <sup>[16, 17]</sup> ; |                                                                                                                                                                                                                                                                                                                                                         |
|                       | Glycosylation                                                                                                                                      | H2BS112GlcNAc <sup>[3, 18]</sup>                                                                                                                                                                                                                                                                                                                                                                                                                                         | T72GlcNAc <sup>[19]</sup> ;<br>T75GlcNAc <sup>[19]</sup> ;<br>T81GlcNAc <sup>[19]</sup> ;<br>S87GlcNAc <sup>[19]</sup>        | N359GlcNAc <sup>[15, 20]</sup> ;<br>N359Man <sub>5</sub> GlcNAc <sub>2</sub> <sup>[20]</sup> ;<br>N410GlcNAc <sup>[20]</sup> ;<br>N410Man <sub>5</sub> GlcNAc <sub>2</sub> <sup>[20]</sup> ; |                                                                                        | Antifreeze glycoproteins <sup>[21]</sup> ;<br>143glycosyl-IL-6 <sup>[22]</sup> ;<br>glycosylated IFN- $\beta$ <sup>[23]</sup> ;<br>Erythropoietin glycoform 1 <sup>[24]</sup> ;<br>Glycoprotein D <sup>[25]</sup> ;                                                                                                                                     |
|                       | Phosphorylation                                                                                                                                    | H2AS1p <sup>[12]</sup> ;<br>H2AY57p <sup>[26]</sup> ;                                                                                                                                                                                                                                                                                                                                                                                                                    | Y39p <sup>[27, 28]</sup> ;<br>S87p <sup>[27]</sup> ;<br>Y125p <sup>[29]</sup> ;<br>S129p <sup>[30]</sup>                      | S305p <sup>[15]</sup> ;<br>Y310p <sup>[14, 15]</sup> ;<br>S352p <sup>[15]</sup> ;<br>S356p <sup>[15]</sup> ;<br>S396pS404p <sup>[14]</sup>                                                   | S2p <sup>[31]</sup> ;<br>S11p <sup>[31]</sup> ;<br>S2pS11p <sup>[17, 31]</sup> ;       | Ub<br>T7/12/14/22/55/66<br>p <sup>[32]</sup> ;<br>K <sub>63</sub> -Ub <sub>2</sub> S65p <sup>[33]</sup> ;<br>p19 <sup>INK4d</sup><br>S66pS76p <sup>[34]</sup><br>IGFBP-2 S107p <sup>[35]</sup>                                                                                                                                                          |
| Mirror-image proteins |                                                                                                                                                    | <sup>D</sup> ASFV pol X <sup>[36]</sup> ; <sup>D</sup> LigA DNA-ligase <sup>[37]</sup> ; <sup>D</sup> T7 RNA-polymerase <sup>[38]</sup> ; <sup>D</sup> IGV <sup>TIGIT</sup> <sup>[39]</sup> ; <sup>D</sup> PD1 <sub>21-167</sub> <sup>[40]</sup> ; <sup>D</sup> KRAS(G12V) <sup>[41]</sup> ; <sup>D</sup> IL-6 <sup>[42]</sup> ;<br><sup>D</sup> Rv1738 <sup>[43]</sup> ; <sup>D</sup> K27-Ub <sub>3</sub> <sup>[44]</sup> ; <sup>D</sup> monobody-DAM27 <sup>[45]</sup> |                                                                                                                               |                                                                                                                                                                                              |                                                                                        |                                                                                                                                                                                                                                                                                                                                                         |
| Protein probes        | K48/K63-diUb <sub>photo</sub> <sup>[46]</sup> ; Ubch7 <sub>Dap</sub> -Ub <sub>Dha</sub> <sup>[47]</sup> ; H2AK119Ub <sub>Dha</sub> <sup>[48]</sup> |                                                                                                                                                                                                                                                                                                                                                                                                                                                                          |                                                                                                                               |                                                                                                                                                                                              |                                                                                        |                                                                                                                                                                                                                                                                                                                                                         |

**Table S1.** Representative examples obtained from native chemical ligation coupled with VA-044-based desulfurization.

## References

- 1 H. Ai, M. Sun, A. Liu, Z. Sun, T. Liu, L. Cao, L. Liang, Q. Qu, Z. Li, Z. Deng, Z. Tong, G. Chu, X. Tian, H. Deng, S. Zhao, J. B. Li, Z. Lou and L. Liu, H2B Lys34 Ubiquitination Induces Nucleosome Distortion to Stimulate Dot1L Activity. *Nat Chem Biol*, 2022, **18**, 972-980.
- 2 J. Li, Q. He, Y. Liu, S. Liu, S. Tang, C. Li, D. Sun, X. Li, M. Zhou, P. Zhu, G. Bi, Z. Zhou, J. S. Zheng and C. Tian, Chemical Synthesis of K34-Ubiquitylated H2B for Nucleosome Reconstitution and Single-Particle Cryo-Electron Microscopy Structural Analysis. *ChemBiochem*, 2017, **18**, 176-180.

- 3 M. Seenaiah, M. Jbara, S. M. Mali and A. Brik, Convergent versus sequential protein synthesis: the case of ubiquitinated and glycosylated H2B. *Angew Chem Int Ed Engl*, 2015, **54**, 12374-12378.
- 4 R. K. McGinty, J. Kim, C. Chatterjee, R. G. Roeder and T. W. Muir, Chemically ubiquitylated histone H2B stimulates hDot1L-mediated intranucleosomal methylation. *Nature*, 2008, **453**, 812-816.
- 5 M. Sun, Y. Du, Z. Li, A. Aderjiang, M. Xin and H. Ai, Chemically Synthesized H3K14Ub Unveils Clr4's IDR-Mediated Multivalent Nucleosome Recognition in H3K9 Methylation. *Angew Chem Int Ed Engl*, 2026, **65**, e20817.
- 6 Y. K. Qi, Q. Q. He, H. S. Ai, J. Guo and J. B. Li, The convergent chemical synthesis of histone H3 protein for site-specific acetylation at Lys56 and ubiquitination at Lys122. *Chem Commun (Camb)*, 2017, **53**, 4148-4151.
- 7 M. Hejjaoui, M. Haj-Yahya, K. S. Kumar, A. Brik and H. A. Lashuel, Towards elucidation of the role of ubiquitination in the pathogenesis of Parkinson's disease with semisynthetic ubiquitinated  $\alpha$ -synuclein. *Angew Chem Int Ed Engl*, 2011, **50**, 405-409.
- 8 M. Haj-Yahya, B. Fauvet, Y. Herman-Bachinsky, M. Hejjaoui, S. N. Bavikar, S. V. Karthikeyan, A. Ciechanover, H. A. Lashuel and A. Brik, Synthetic polyubiquitinated  $\alpha$ -Synuclein reveals important insights into the roles of the ubiquitin chain in regulating its pathophysiology. *Proc Natl Acad Sci U S A*, 2013, **110**, 17726-17731.
- 9 K. S. Kumar, L. Spasser, L. A. Erlich, S. N. Bavikar and A. Brik, Total chemical synthesis of di-ubiquitin chains. *Angew Chem Int Ed Engl*, 2010, **49**, 9126-9131.
- 10 S. Tang, L. J. Liang, Y. Y. Si, S. Gao, J. X. Wang, J. Liang, Z. Mei, J. S. Zheng and L. Liu, Practical Chemical Synthesis of Atypical Ubiquitin Chains by Using an Isopeptide-Linked Ub Isomer. *Angew Chem Int Ed Engl*, 2017, **56**, 13333-13337.
- 11 H. Sun, S. M. Mali, S. K. Singh, R. Meledin, A. Brik, Y. T. Kwon, Y. Kravtsova-Ivantsiv, B. Bercovich and A. Ciechanover, Diverse fate of ubiquitin chain moieties: The proximal is degraded with the target, and the distal protects the proximal from removal and recycles. *Proc Natl Acad Sci U S A*, 2019, **116**, 7805-7812.
- 12 G. Hayashi, T. Sueoka and A. Okamoto, In vitro and in cell analysis of chemically synthesized histone H2A with multiple modifications. *Chem Commun (Camb)*, 2016, **52**, 4999-5002.
- 13 B. Fauvet, M. B. Fares, F. Samuel, I. Dikiy, A. Tandon, D. Eliezer and H. A. Lashuel, Characterization of semisynthetic and naturally N $\alpha$ -acetylated  $\alpha$ -synuclein in vitro and in intact cells: implications for aggregation and cellular properties of  $\alpha$ -synuclein. *J Biol Chem*, 2012, **287**, 28243-28262.
- 14 M. Haj-Yahya and H. A. Lashuel, Protein Semisynthesis Provides Access to Tau Disease-Associated Post-translational Modifications (PTMs) and Paves the Way to Deciphering the Tau PTM Code in Health and Diseased States. *J Am Chem Soc*, 2018, **140**, 6611-6621.
- 15 W. C. Powell, M. Nahum, K. Pankratz, M. Herlory, J. Greenwood, D. Poliyenko, P. Holland, R. Jing, L. Biggerstaff, M. H. B. Stowell and M. A. Walczak, Post-Translational Modifications Control Phase Transitions of Tau. *ACS Cent Sci*, 2024, **10**, 2145-2161.
- 16 R. V. Nithun, Y. M. Yao, O. Harel, S. Habiballah, A. Afek and M. Jbara, Site-Specific Acetylation of the Transcription Factor Protein Max Modulates Its DNA Binding Activity. *ACS Cent Sci*, 2024, **10**, 1295-1303.
- 17 R. V. Nithun, S. Khoury and M. Jbara, One-Pot Total Synthesis of a Post-translationally

- Modified Max Transcription Factor Sheds Light on Ser-Phosphorylation and Lys-Acetylation Crosstalk in DNA Binding. *Org Lett*, 2025, **27**, 3760-3764.
- 18 Z. Deng, S. Tao, Y. Du, Y. Li, L. Zhang, Q. Shi, X. Du, M. Sun, Z. Tong, M. Pan, L. Liu and H. Ai, Allosteric activation of RNF20/RNF40-RAD6A-mediated H2BK120 monoubiquitylation by H2BS112 GlcNAcylation. *Nat Chem Biol*, 2026, **22**, 740-750.
- 19 P. M. Levine, A. Galesic, A. T. Balana, A. L. Mahul-Mellier, M. X. Navarro, C. A. De Leon, H. A. Lashuel and M. R. Pratt,  $\alpha$ -Synuclein O-GlcNAcylation alters aggregation and toxicity, revealing certain residues as potential inhibitors of Parkinson's disease. *Proc Natl Acad Sci U S A*, 2019, **116**, 1511-1519.
- 20 W. C. Powell, R. Jing, M. Herlory, P. Holland, D. Poliyenko, C. C. Ebmeier, M. H. B. Stowell and M. A. Walczak, Chemical Synthesis Reveals Pathogenic Role of N-Glycosylation in Microtubule-Associated Protein Tau. *J Am Chem Soc*, 2025, **147**, 6995-7007.
- 21 B. L. Wilkinson, R. S. Stone, C. J. Capicciotti, M. Thaysen-Andersen, J. M. Matthews, N. H. Packer, R. N. Ben and R. J. Payne, Total synthesis of homogeneous antifreeze glycopeptides and glycoproteins. *Angew Chem Int Ed Engl*, 2012, **51**, 3606-3610.
- 22 Y. Liu, Y. Maki, R. Okamoto, A. Satoh, Y. Todokoro, Y. Kanemitsu, K. Otani and Y. Kajihara, Uncovering a Latent Bioactive Interleukin-6 Glycoform. *Angew Chem Int Ed Engl*, 2024, **63**, e202411213.
- 23 I. Sakamoto, K. Tezuka, K. Fukae, K. Ishii, K. Taduru, M. Maeda, M. Ouchi, K. Yoshida, Y. Nambu, J. Igarashi, N. Hayashi, T. Tsuji and Y. Kajihara, Chemical synthesis of homogeneous human glycosyl-interferon- $\beta$  that exhibits potent antitumor activity in vivo. *J Am Chem Soc*, 2012, **134**, 5428-5431.
- 24 P. Wang, S. Dong, J. H. Shieh, E. Peguero, R. Hendrickson, M. A. S. Moore and S. J. Danishefsky, Erythropoietin derived by chemical synthesis. *Science*, 2013, **342**, 1357-1360.
- 25 J. Zhao, X. Liu, J. Liu, F. Ye, B. Wei, M. Deng, T. Li, P. Huang and P. Wang, Chemical Synthesis Creates Single Glycoforms of the Ectodomain of Herpes Simplex Virus-1 Glycoprotein D. *J Am Chem Soc*, 2024, **146**, 2615-2623.
- 26 M. Jbara, S. K. Maity, M. Morgan, C. Wolberger and A. Brik, Chemical Synthesis of Phosphorylated Histone H2A at Tyr57 Reveals Insight into the Inhibition Mode of the SAGA Deubiquitinating Module. *Angew Chem Int Ed Engl*, 2016, **55**, 4972-4976.
- 27 S. Zhang, R. Zhu, B. Pan, H. Xu, M. F. Olufemi, R. J. Gathagan, Y. Li, L. Zhang, J. Zhang, W. Xiang, E. M. Kagan, X. Cao, C. Yuan, S. J. Kim, C. K. Williams, S. Magaki, H. V. Vinters, H. A. Lashuel, B. A. Garcia, E. James Petersson, J. Q. Trojanowski, V. M. Lee and C. Peng, Post-translational modifications of soluble  $\alpha$ -synuclein regulate the amplification of pathological  $\alpha$ -synuclein. *Nat Neurosci*, 2023, **26**, 213-225.
- 28 K. Zhao, Y. J. Lim, Z. Liu, H. Long, Y. Sun, J. J. Hu, C. Zhao, Y. Tao, X. Zhang, D. Li, Y. M. Li and C. Liu, Parkinson's disease-related phosphorylation at Tyr39 rearranges  $\alpha$ -synuclein amyloid fibril structure revealed by cryo-EM. *Proc Natl Acad Sci U S A*, 2020, **117**, 20305-20315.
- 29 M. Hejjaoui, S. Butterfield, B. Fauvet, F. Vercautse, J. Cui, I. Dikiy, M. Prudent, D. Olschewski, Y. Zhang, D. Eliezer and H. A. Lashuel, Elucidating the role of C-terminal post-translational modifications using protein semisynthesis strategies:  $\alpha$ -synuclein phosphorylation at tyrosine 125. *J Am Chem Soc*, 2012, **134**, 5196-5210.
- 30 L. M. Gatzemeier, F. Meyer, U. Diederichsen and T. F. Outeiro, Chemical Synthesis of Alpha-

- Synuclein Proteins via Solid-Phase Peptide Synthesis and Native Chemical Ligation. *Chemistry*, 2023, **29**, e202300649.
- 31 R. V. Nithun, Y. M. Yao, X. Lin, S. Habiballah, A. Afek and M. Jbara, Deciphering the Role of the Ser-Phosphorylation Pattern on the DNA-Binding Activity of Max Transcription Factor Using Chemical Protein Synthesis. *Angew Chem Int Ed Engl*, 2023, **62**, e202310913.
- 32 B. Wang, C. Li, F. Zhao, L. Shi, X. Li, Y. Liu, S. Sun, L. Yuan, M. Sun, Y. Zhang, J. Shi and L. J. Liang, Examining the Role of Threonine Phosphorylation in Ubiquitin's Function Using Chemical Protein Synthesis. *JACS Au*, 2025, **5**, 2148-2158.
- 33 S. Bondalapati, W. Mansour, M. A. Nakasone, S. K. Maity, M. H. Glickman and A. Brik, Chemical synthesis of phosphorylated ubiquitin and diubiquitin exposes positional sensitivities of e1-e2 enzymes and deubiquitinases. *Chem Eur J*, 2015, **21**, 7360-7364.
- 34 M. Msallam, H. Sun, R. Meledin, P. Franz and A. Brik, Examining the role of phosphorylation of p19(INK4d) in its stability and ubiquitination using chemical protein synthesis. *Chem Sci*, 2020, **11**, 5526-5531.
- 35 B. Premdjee, A. S. Andersen, M. Larance, K. W. Conde-Frieboes and R. J. Payne, Chemical Synthesis of Phosphorylated Insulin-like Growth Factor Binding Protein 2. *J Am Chem Soc*, 2021, **143**, 5336-5342.
- 36 Z. Wang, W. Xu, L. Liu and T. F. Zhu, A synthetic molecular system capable of mirror-image genetic replication and transcription. *Nat Chem*, 2016, **8**, 698-704.
- 37 J. Weidmann, M. Schnölzer, P. E. Dawson and J. D. Hoheisel, Copying Life: Synthesis of an Enzymatically Active Mirror-Image DNA-Ligase Made of D-Amino Acids. *Cell Chem Biol*, 2019, **26**, 645-651.e643.
- 38 Y. Xu and T. F. Zhu, Mirror-image T7 transcription of chirally inverted ribosomal and functional RNAs. *Science*, 2022, **378**, 405-412.
- 39 B. Zhang, Y. Zheng, G. Chu, X. Deng, T. Wang, W. Shi, Y. Zhou, S. Tang, J. S. Zheng and L. Liu, Backbone-Installed Split Intein-Assisted Ligation for the Chemical Synthesis of Mirror-Image Proteins. *Angew Chem Int Ed Engl*, 2023, **62**, e202306270.
- 40 H. Zhou, H. Wu, Z. Zhong, P. Blasco, J. Zeng, J. Wang, H. Liu and X. Li, Discovery of d-Miniprotein Inhibitors of PD-1/PD-L1 Interaction via Mirror-Image Phage Display against Synthetic d-PD-1. *JACS Au*, 2025, **5**, 6200-6209.
- 41 A. M. Levinson, J. H. McGee, A. G. Roberts, G. S. Creech, T. Wang, M. T. Peterson, R. C. Hendrickson, G. L. Verdine and S. J. Danishefsky, Total Chemical Synthesis and Folding of All-l and All-d Variants of Oncogenic KRas(G12V). *J Am Chem Soc*, 2017, **139**, 7632-7639.
- 42 Y. Ren, Y. Liu, D. Han and L. J. Liang, An Integrated Solubilizing-Tag-Free Strategy for Chemical Synthesis of Mirror-Image Interleukin-6. *Org Lett*, 2025, **27**, 10760-10765.
- 43 R. D. Bunker, K. Mandal, G. Bashiri, J. J. Chaston, B. L. Pentelute, J. S. Lott, S. B. Kent and E. N. Baker, A functional role of Rv1738 in Mycobacterium tuberculosis persistence suggested by racemic protein crystallography. *Proc Natl Acad Sci U S A*, 2015, **112**, 4310-4315.
- 44 M. Pan, S. Gao, Y. Zheng, X. Tan, H. Lan, X. Tan, D. Sun, L. Lu, T. Wang, Q. Zheng, Y. Huang, J. Wang and L. Liu, Quasi-Racemic X-ray Structures of K27-Linked Ubiquitin Chains Prepared by Total Chemical Synthesis. *J Am Chem Soc*, 2016, **138**, 7429-7435.
- 45 N. Schmidt, A. Kumar, L. Korf, A. V. Dinh-Fricke, F. Abendroth, A. Koide, U. Linne, M. Rakwalska-Bange, S. Koide, L. O. Essen, O. Vázquez and O. Hantschel, Development of mirror-image monoclonal antibodies targeting the oncogenic BCR::ABL1 kinase. *Nat Commun*, 2024, **15**,

10724.

- 46 J. Liang, L. Zhang, X. L. Tan, Y. K. Qi, S. Feng, H. Deng, Y. Yan, J. S. Zheng, L. Liu and C. L. Tian, Chemical Synthesis of Diubiquitin-Based Photoaffinity Probes for Selectively Profiling Ubiquitin-Binding Proteins. *Angew Chem Int Ed Engl*, 2017, **56**, 2744-2748.
- 47 L. J. Liang, G. C. Chu, Q. Qu, C. Zuo, J. Mao, Q. Zheng, J. Chen, X. Meng, Y. Jing, H. Deng, Y. M. Li and L. Liu, Chemical Synthesis of Activity-Based E2-Ubiquitin Probes for the Structural Analysis of E3 Ligase-Catalyzed Transthiolation. *Angew Chem Int Ed Engl*, 2021, **60**, 17171-17177.
- 48 M. Jbara, S. Laps, M. Morgan, G. Kamnesky, G. Mann, C. Wolberger and A. Brik, Palladium prompted on-demand cysteine chemistry for the synthesis of challenging and uniquely modified proteins. *Nat Commun*, 2018, **9**, 3154.
